# Supplementary material for: A Structural Model of the Genome Packaging Process in a Membrane-Containing Double Stranded DNA Virus
Source: PLoS Biol. 2014 Dec 16;12(12):e1002024. doi: 10.1371/journal.pbio.1002024 (PMC4267777; doi:10.1371/journal.pbio.1002024)
Supplement: Data S2 — Numerical data for the FSC plot in Figure S2B. (XLSX) [file pbio.1002024.s013.xlsx]

## Sheet: FigureS2B-numerical-data.txt
0.00998004	0.996728
0.0199601	0.976511
0.0299401	0.929131
0.0399202	0.887229
0.0499002	0.830327
0.0598802	0.720142
0.0698603	0.568738
0.0798403	0.412803
0.0898204	0.3364
0.0998004	0.222886
0.10978	0.147488
0.11976	0.02439
0.129741	-0.005951
0.139721	-0.012742
0.149701	-0.048647
0.159681	-0.054195
0.169661	-0.015796
0.179641	-0.039849
0.189621	-0.080546
0.199601	-0.069731
0.209581	-0.058011
0.219561	-0.045425
0.229541	-0.06118
0.239521	-0.031856
0.249501	-0.02154
0.259481	-0.020863
0.269461	0.003035
0.279441	0.008728
0.289421	0.024792
0.299401	0.043129
