# Supplementary material for: A Structural Model of the Genome Packaging Process in a Membrane-Containing Double Stranded DNA Virus
Source: PLoS Biol. 2014 Dec 16;12(12):e1002024. doi: 10.1371/journal.pbio.1002024 (PMC4267777; doi:10.1371/journal.pbio.1002024)
Supplement: Data S3 — Numerical data for the FSC plot in Figure S3A. (XLSX) [file pbio.1002024.s014.xlsx]

## Sheet: FigureS3A-numerical-data.txt
0.00117371	0.999937
0.00234742	0.999806
0.00352113	0.999589
0.00469484	0.999226
0.00586854	0.998603
0.00704225	0.997584
0.00821596	0.99635
0.00938967	0.995174
0.0105634	0.994077
0.0117371	0.992796
0.0129108	0.98954
0.0140845	0.982762
0.0152582	0.967248
0.0164319	0.936908
0.0176056	0.894785
0.0187793	0.847007
0.0199531	0.803507
0.0211268	0.770911
0.0223005	0.765055
0.0234742	0.785328
0.0246479	0.828324
0.0258216	0.870398
0.0269953	0.883327
0.028169	0.885287
0.0293427	0.876797
0.0305164	0.865232
0.0316901	0.862697
0.0328639	0.865172
0.0340376	0.875012
0.0352113	0.879437
0.036385	0.872012
0.0375587	0.852718
0.0387324	0.820794
0.0399061	0.787514
0.0410798	0.762354
0.0422535	0.744731
0.0434272	0.727581
0.0446009	0.699284
0.0457746	0.645484
0.0469484	0.573157
0.0481221	0.504523
0.0492958	0.472941
0.0504695	0.468811
0.0516432	0.457987
0.0528169	0.438239
0.0539906	0.388216
0.0551643	0.350634
0.056338	0.336369
0.0575117	0.354237
0.0586854	0.382635
0.0598592	0.39517
0.0610329	0.39445
0.0622066	0.359702
0.0633803	0.320716
0.064554	0.275389
0.0657277	0.232422
0.0669014	0.182924
0.0680751	0.140564
0.0692488	0.099959
0.0704225	0.066396
0.0715962	0.047889
0.07277	0.045147
0.0739437	0.048086
0.0751174	0.069669
0.0762911	0.081399
0.0774648	0.098336
0.0786385	0.107265
0.0798122	0.099547
0.0809859	0.096345
0.0821596	0.084132
0.0833333	0.085411
0.084507	0.09077
0.0856808	0.092699
0.0868545	0.094433
0.0880282	0.077602
0.0892019	0.056223
0.0903756	0.029143
0.0915493	0.006168
0.092723	-0.001137
0.0938967	-0.003846
0.0950704	0.005922
0.0962441	0.022647
0.0974178	0.037255
0.0985916	0.052966
0.0997653	0.061541
0.100939	0.067153
0.102113	0.062741
0.103286	0.063613
0.10446	0.059311
0.105634	0.060746
0.106808	0.058702
0.107981	0.054573
0.109155	0.044277
0.110329	0.032527
0.111502	0.015137
0.112676	0.004936
0.11385	-0.004109
0.115023	-0.001721
0.116197	0.000333
0.117371	0.00482
0.118545	0.002442
0.119718	0.001051
0.120892	-0.006167
0.122066	-0.009141
0.123239	-0.006849
0.124413	-0.003792
0.125587	0.002932
0.126761	0.006076
0.127934	0.011231
0.129108	0.013216
0.130282	0.018405
0.131455	0.02633
0.132629	0.030326
0.133803	0.036414
0.134977	0.036931
0.13615	0.035275
0.137324	0.033047
0.138498	0.028968
0.139671	0.024488
0.140845	0.024094
0.142019	0.017897
0.143192	0.018216
0.144366	0.008899
0.14554	0.002449
0.146714	-0.006794
0.147887	-0.017956
0.149061	-0.022859
0.150235	-0.02108
0.151408	-0.015492
0.152582	-0.003711
0.153756	0.004605
0.15493	0.008292
0.156103	0.004409
0.157277	0.000928
0.158451	-0.004728
0.159624	-0.003827
0.160798	0.003867
0.161972	0.014941
0.163146	0.022206
0.164319	0.023438
0.165493	0.019479
0.166667	0.009958
0.16784	-0.002746
0.169014	-0.014491
0.170188	-0.019762
0.171362	-0.016189
0.172535	-0.005262
0.173709	0.010245
0.174883	0.021182
0.176056	0.025489
0.17723	0.022638
0.178404	0.013941
0.179577	0.002825
0.180751	-0.006271
0.181925	-0.010977
0.183099	-0.010815
0.184272	-0.007916
0.185446	-0.004142
0.18662	-0.000143
0.187793	0.003631
0.188967	0.008025
0.190141	0.011183
0.191315	0.014125
0.192488	0.014823
0.193662	0.013647
0.194836	0.010218
0.196009	0.006715
0.197183	0.005743
0.198357	0.006822
0.199531	0.009493
0.200704	0.011994
0.201878	0.011091
0.203052	0.005644
0.204225	0.000704
0.205399	-0.002751
0.206573	-0.005436
0.207746	-0.003967
0.20892	-0.000248
0.210094	-0.001764
0.211268	-0.00249
0.212441	-0.007603
0.213615	-0.014737
0.214789	-0.018371
0.215962	-0.020944
0.217136	-0.018086
0.21831	-0.014556
0.219484	-0.008601
0.220657	-0.00508
0.221831	-0.001582
0.223005	0.000999
0.224178	0.001378
0.225352	0.003637
0.226526	0.003951
0.2277	0.007784
0.228873	0.007053
0.230047	0.006362
0.231221	0.001335
0.232394	-0.004195
0.233568	-0.012764
0.234742	-0.016699
0.235915	-0.018806
0.237089	-0.018341
0.238263	-0.014061
0.239437	-0.011519
0.24061	-0.009105
0.241784	-0.007979
0.242958	-0.006025
0.244131	-0.004829
0.245305	-0.000474
0.246479	0.002194
0.247653	0.004062
0.248826	0.005596
0.25	0.005023
0.251174	0.00541
0.252347	0.004448
0.253521	0.00421
0.254695	0.005652
0.255869	0.004817
0.257042	0.004678
0.258216	0.002684
0.25939	0.003318
0.260563	0.002345
0.261737	0.003929
0.262911	0.004583
0.264085	0.00372
0.265258	0.004549
0.266432	0.004455
0.267606	0.00465
0.268779	0.005633
0.269953	0.006672
0.271127	0.006553
0.2723	0.005782
0.273474	0.003946
0.274648	0.003464
0.275822	0.003083
0.276995	0.003572
0.278169	0.005223
0.279343	0.008206
0.280516	0.009631
0.28169	0.009931
0.282864	0.009757
0.284038	0.00749
0.285211	0.005874
0.286385	0.001713
0.287559	-0.001276
0.288732	-0.005721
0.289906	-0.007425
0.29108	-0.01049
0.292254	-0.013151
0.293427	-0.013438
0.294601	-0.013089
0.295775	-0.010783
0.296948	-0.006439
0.298122	-0.002514
0.299296	0.000526
0.300469	-7.6e-05
0.301643	-0.001787
0.302817	-0.004639
0.303991	-0.006785
0.305164	-0.008452
0.306338	-0.007362
0.307512	-0.005293
0.308685	-0.003752
0.309859	-0.002871
0.311033	-0.003197
0.312207	-0.005827
0.31338	-0.008403
0.314554	-0.012416
0.315728	-0.014273
0.316901	-0.016541
0.318075	-0.015902
0.319249	-0.013001
0.320423	-0.009679
0.321596	-0.00756
0.32277	-0.003994
0.323944	-0.004095
0.325117	-0.003302
0.326291	-0.004164
0.327465	-0.004895
0.328638	-0.004011
0.329812	-0.005759
0.330986	-0.006494
0.33216	-0.009656
0.333333	-0.014061
0.334507	-0.018804
0.335681	-0.021344
0.336854	-0.021213
0.338028	-0.016703
0.339202	-0.009228
0.340376	-0.00141
0.341549	0.0049
0.342723	0.00866
0.343897	0.007742
0.34507	0.005251
0.346244	0.001849
0.347418	0.000603
0.348592	-0.000307
0.349765	0.000827
0.350939	0.000483
0.352113	-0.000802
